# Supplementary material for: The Role of CT Radiomics Analysis in Predicting Overall Survival Following initial Chemotherapy for Diffuse Large B-cell Lymphoma
Source: Research Square preprint supplement (doi:10.21203/rs.3.rs-4063556/v1), 2024-04-19
Supplement: Supplementary file 1 [file 15236b791a02ace05110db2d.docx]

Training Cohort (n=91)

Validation Cohort (n=39)

DLBCL patients from 2013 to 2018 (n=369)

130 cases eligible patients were included in the study

Exclusion

- poor quality of CT images due to artefacts (n=51)
- the presence of contraindications to chemotherapy, severe cardiac, epatic, and renal diseases, and those who have not completed 4 cycles of chemotherapy in a standardized manner (n=104)
- imperfect imaging and follow-up data (n=84)

Fig S1

| 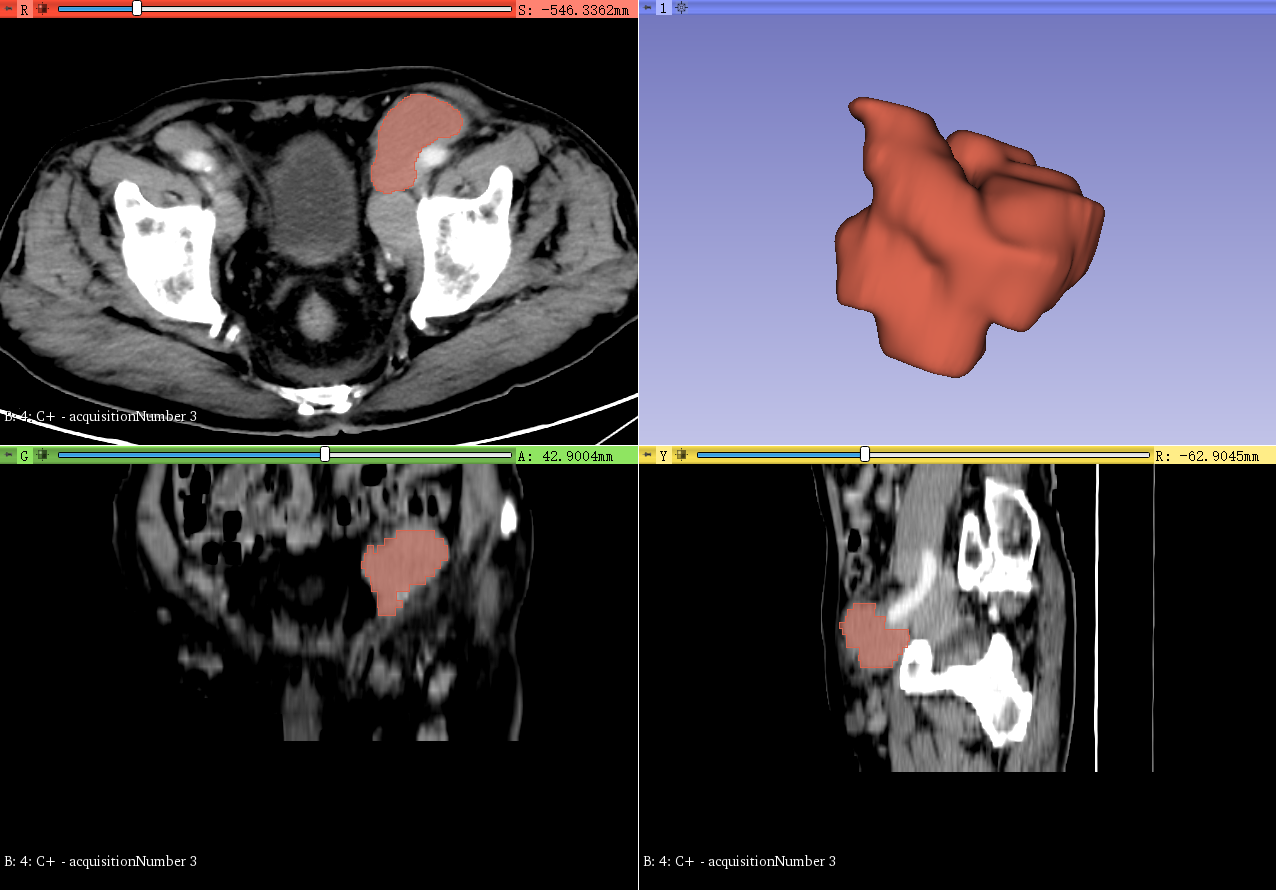 | 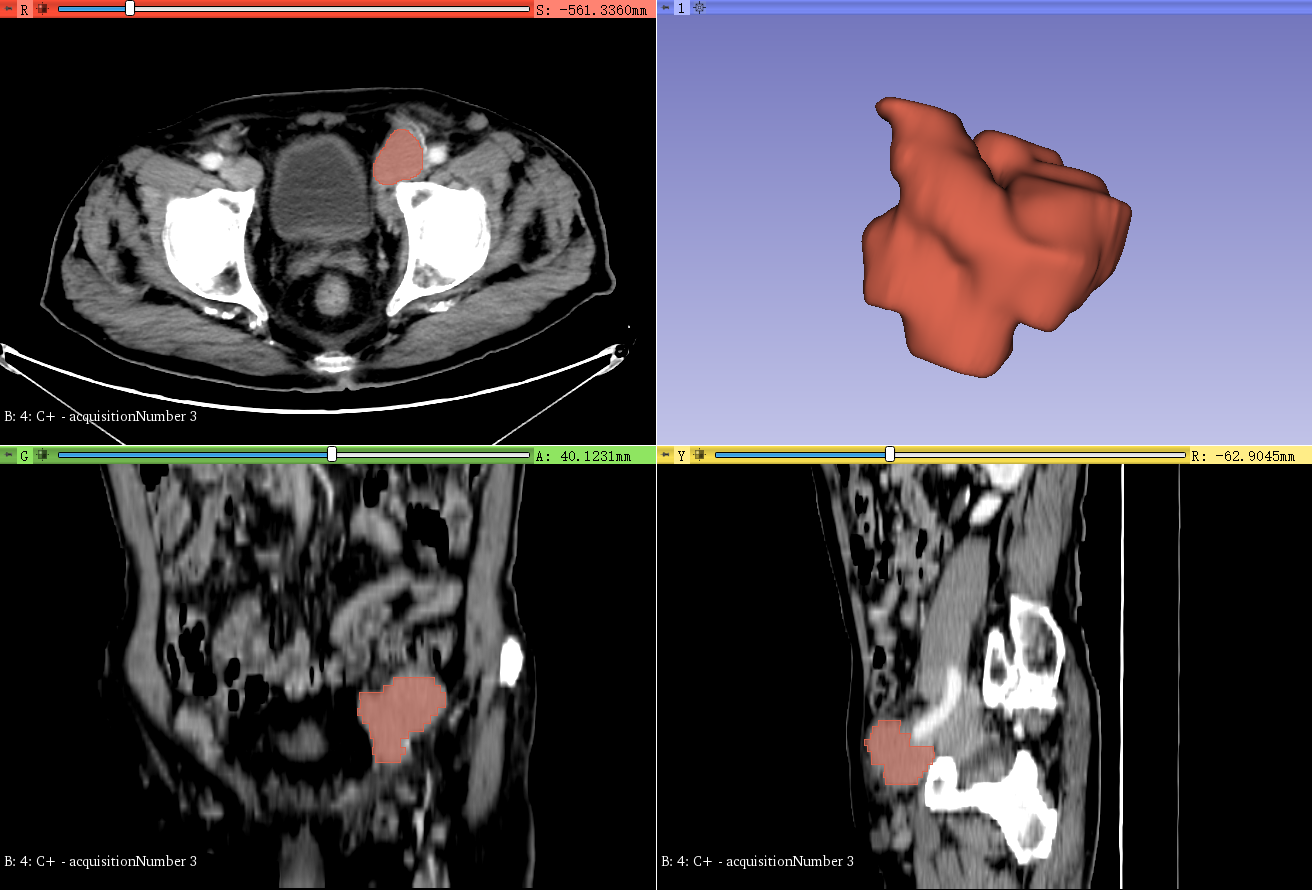 | 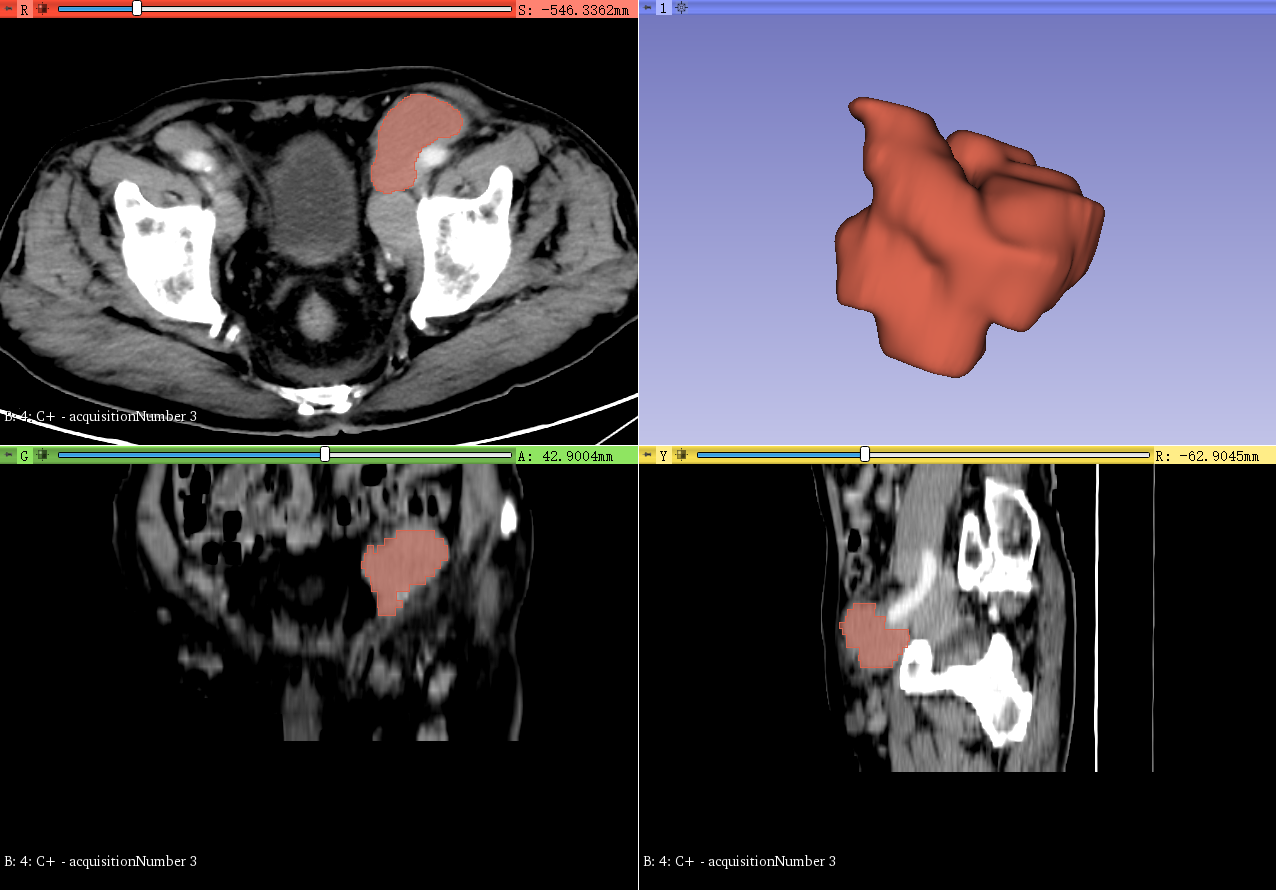 | 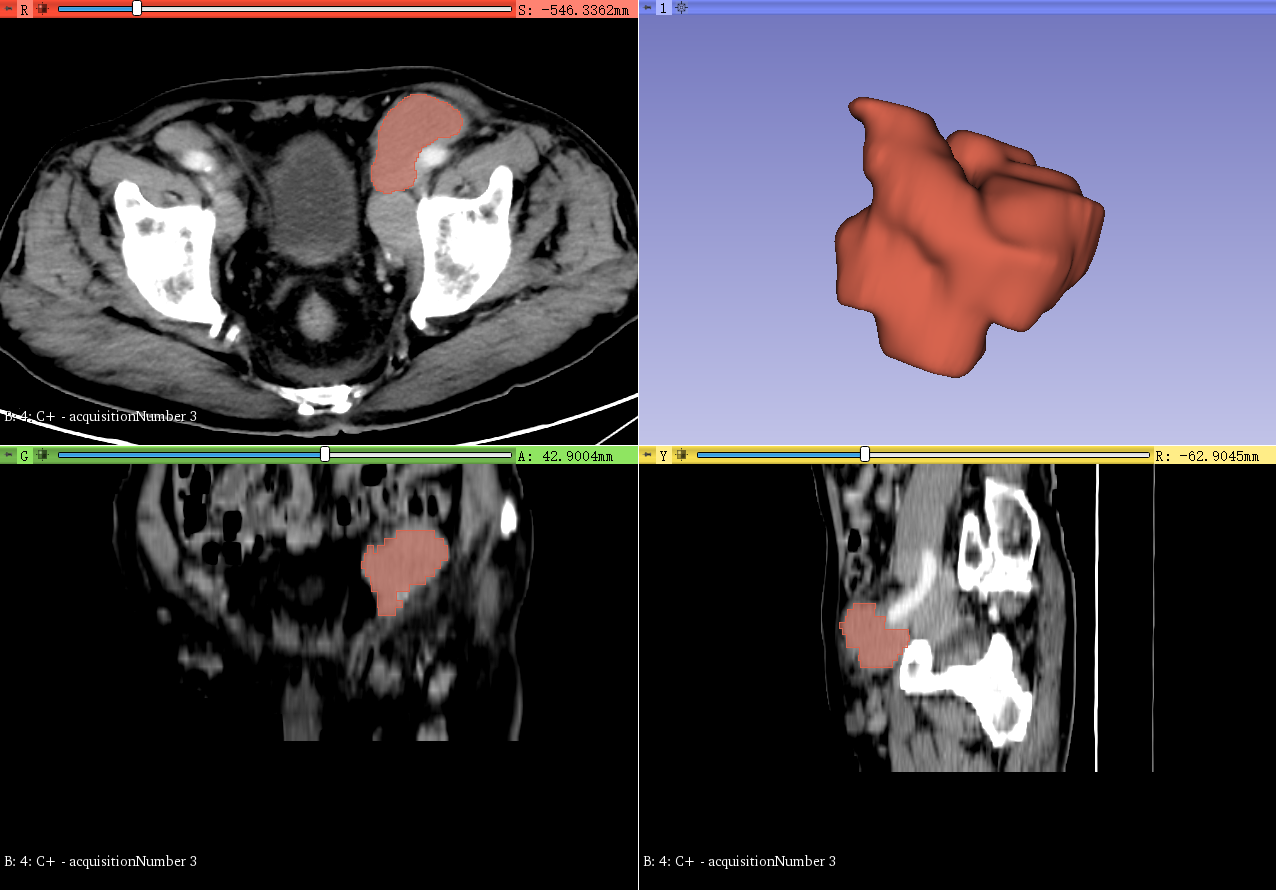 |
| --- | --- | --- | --- |
| Sagittal plane | Segmentation region in axial plane | Coronal plane | Three-Dimensional view |
| Fig S2 | | | |

| Radiomics Features (N=851) | | | | | | |
| --- | --- | --- | --- | --- | --- | --- |
| Shape Features(n=14) | FirstOrder Features(n=162) | Gray Level CO-Occurrence Matrix(n=216) | Gray Level Dependence Matrix(n=126) | Gray Level run length matrix(n=144) | Gray Level size zone matrix(n=144) | Neighboring gray tone difference matrix(n=45) |
| Elongation  Flatness  LeastAxisLength  MajorAxisLength  Maximum2DDiameterColumn  Maximum2DDiameterRow  Maximum2DDiameterSlice  Maximum3DDiameter  MeshVolume  MinorAxisLength  Sphericity  SurfaceArea  SurfaceVolumeRatio  VoxelVolume | Percentile  Energy  Entropy  InterquartileRange  Kurtosis  Maximum  Mean  MeanAbsoluteDeviation  Median  Minimum  Range  RobustMeanAbsoluteDeviation  RootMeanSquared  Skewness  TotalEnergy  Uniformity  Variance | Autocorrelation  ClusterProminence  ClusterShade  ClusterTendency  Contrast  Correlation  DifferenceEntropy  DifferenceVariance  Id  Idm  Idmn  Idn  Imc  InverseVariance  JointAverage  JointEnergy  JointEntropy  MaximumProbability  MCC  SumAverage  SumEntropy  SumSquares | DependenceEntropy  DependenceNonUniformity  DependenceNonUniformityNormalized  DependenceVariance  GrayLevelNonUniformity  GrayLevelVariance  HighGrayLevelEmphasis  LargeDependenceEmphasis  LargeDependenceHighGrayLevelEmphasis  LargeDependenceLowGrayLevelEmphasis  LowGrayLevelEmphasis  SmallDependenceEmphasis  SmallDependenceHighGrayLevelEmphasis  SmallDependenceLowGrayLevelEmphasis | GrayLevelNonUniformity  GrayLevelNonUniformityNormalized  GrayLevelVariance  HighGrayLevelRunEmphasis  LongRunEmphasis  LongRunHighGrayLevelEmphasis  LongRunLowGrayLevelEmphasis  LowGrayLevelRunEmphasis  RunEntropy  RunLengthNonUniformity  RunLengthNonUniformityNormalized  RunPercentage  RunVariance  ShortRunEmphasis  ShortRunHighGrayLevelEmphasis  ShortRunLowGrayLevelEmphasis | GrayLevelNonUniformity  GrayLevelNonUniformityNormalized  GrayLevelVariance  HighGrayLevelZoneEmphasis  LargeAreaEmphasis  LargeAreaHighGrayLevelEmphasis  LargeAreaLowGrayLevelEmphasis  LowGrayLevelZoneEmphasis  SizeZoneNonUniformity  SizeZoneNonUniformityNormalized  SmallAreaEmphasis  SmallAreaHighGrayLevelEmphasis  SmallAreaLowGrayLevelEmphasis  ZoneEntropy  ZonePercentage  ZoneVariance | Busyness  Coarseness  Complexity  Contrast  Strength |
| Table S1 | | | | | | |

| 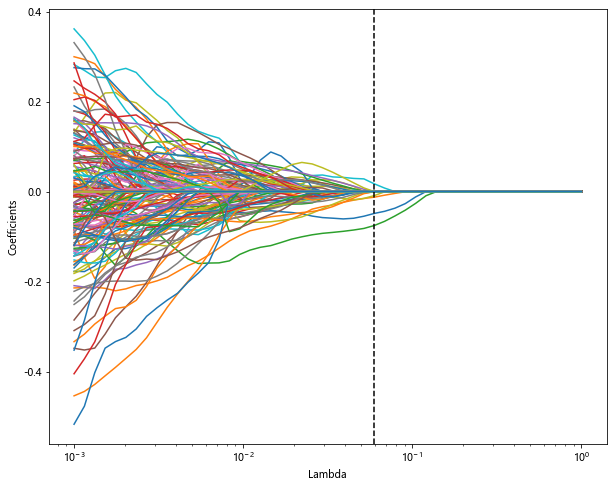 | 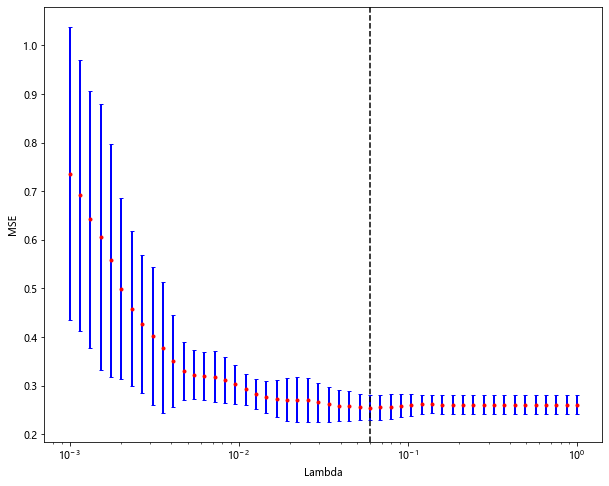 |
| --- | --- |
| 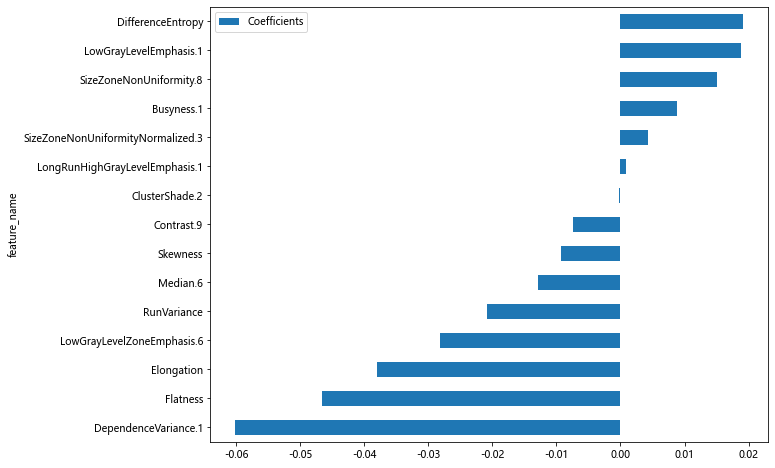 | |
| Fig S3 | |

Table S2 Selected features and their coefficients

|  | Coefficients | Features |
| --- | --- | --- |
| 1 | 0.019083 | DifferenceEntropy |
| 2 | 0.018787 | LowGrayLevelEmphasis.1 |
| 3 | 0.004305 | SizeZoneNonUniformityNormalized.3 |
| 4 | 0.008847 | Busyness.1 |
| 5 | 0.004305 | SizeZoneNonUniformityNormalized.3 |
| 6 | 0.000918 | LongRunHighGrayLevelEmphasis.1 |
| 7 | -0.000250 | ClusterShade.2 |
| 8 | -0.007406 | Contrast.9 |
| 9 | -0.009312 | Skewness |
| 10 | -0.012821 | Median.6 |
| 11 | -0.020902 | RunVariance |
| 12 | -0.028171 | LowGrayLevelZoneEmphasis.6 |
| 13 | -0.038004 | Elongation |
| 14 | -0.046530 | Flatness |
| 15 | -0.060094 | DependenceVariance.1 |

OS=1 = 0.4607838228701024 -0.038004 * Elongation -0.046530 * Flatness -0.009312 * Skewness +0.019083 * DifferenceEntropy -0.020902 * RunVariance -0.060094 * DependenceVariance.1 +0.018787 * LowGrayLevelEmphasis.1 +0.000918 * LongRunHighGrayLevelEmphasis.1 +0.008847 * Busyness.1 -0.000250 * ClusterShade.2 +0.004305 * SizeZoneNonUniformityNormalized.3 -0.007406 * Contrast.9 -0.012821 * Median.6 -0.028171 * LowGrayLevelZoneEmphasis.6 +0.015123 * SizeZoneNonUniformity.8
